# Supplementary material for: Structural Diversity and Highly Specific Host-Pathogen Transcriptional Regulation of Defensin Genes Is Revealed in Tomato
Source: MDPI journal article supplement (doi:10.3390/ijms21249380), 2020-12-09

Nikoloudakis et al.

Structural diversity and highly specific host-pathogen transcriptional regulation of defensin genes is revealed in tomato seedlings

**Supporting information 1: DeepLoc-1.0 localization prediction for *Solanum lycopersicum* defensin genes**

**NP\_001315592.1**

**Prediction: Extracellular, Soluble**

| Localization | Extracellular | Lysosome/Vacuole | Endoplasmic reticulum | Cell membrane | Golgi apparatus | Cytoplasm | Mitochondrion | Plastid | Nucleus | Peroxisome |
|--------------|---------------|------------------|-----------------------|---------------|-----------------|-----------|---------------|---------|---------|------------|
| Likelihood   | 0.9762        | 0.0156           | 0.0062                | 0.0019        | 0.0001          | 0         | 0             | 0       | 0       | 0          |

| Type       | Soluble | Membrane |
|------------|---------|----------|
| Likelihood | 1       | 0        |

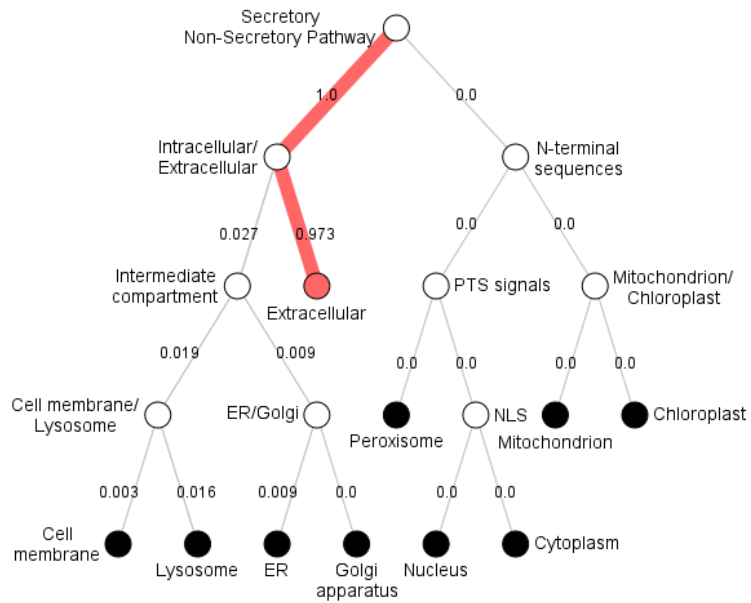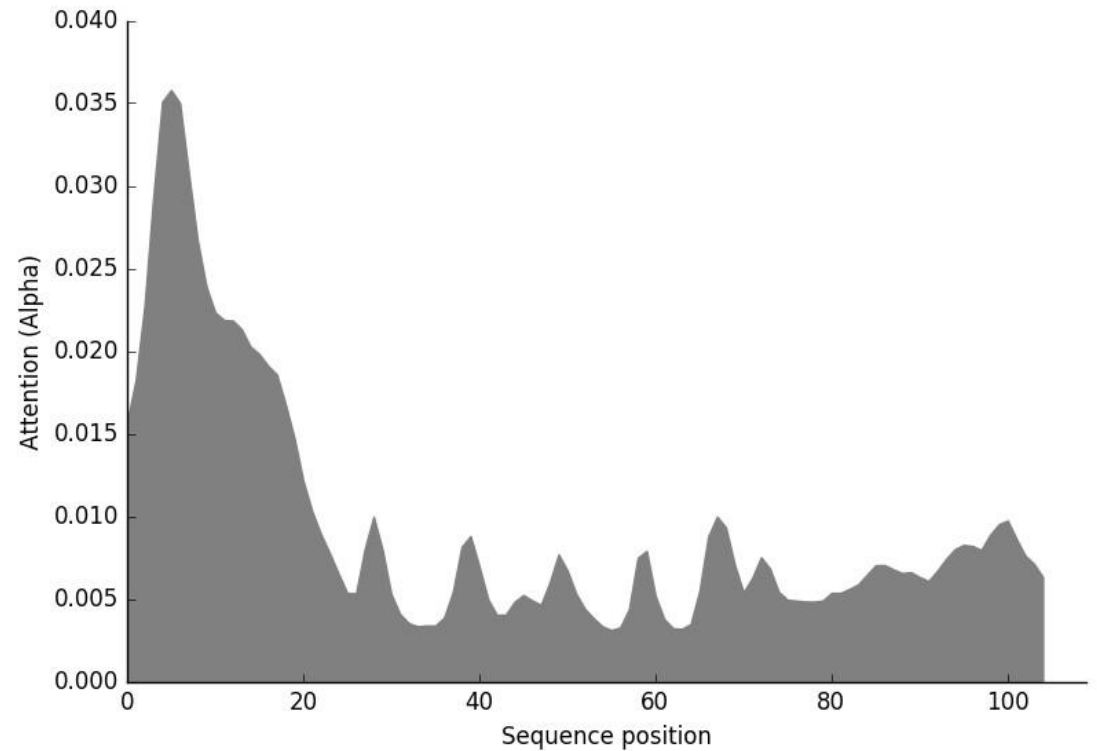

XP\_004242851.1

Prediction: Extracellular, Soluble

| Localization | Extracellular | Lysosome/Vacuole | Endoplasmic reticulum | Cell membrane | Cytoplasm | Golgi apparatus | Mitochondrion | Plastid | Nucleus | Peroxisome |
|--------------|---------------|------------------|-----------------------|---------------|-----------|-----------------|---------------|---------|---------|------------|
| Likelihood   | 1             | 0                | 0                     | 0             | 0         | 0               | 0             | 0       | 0       | 0          |

| Type       | Soluble | Membrane |
|------------|---------|----------|
| Likelihood | 1       | 0        |

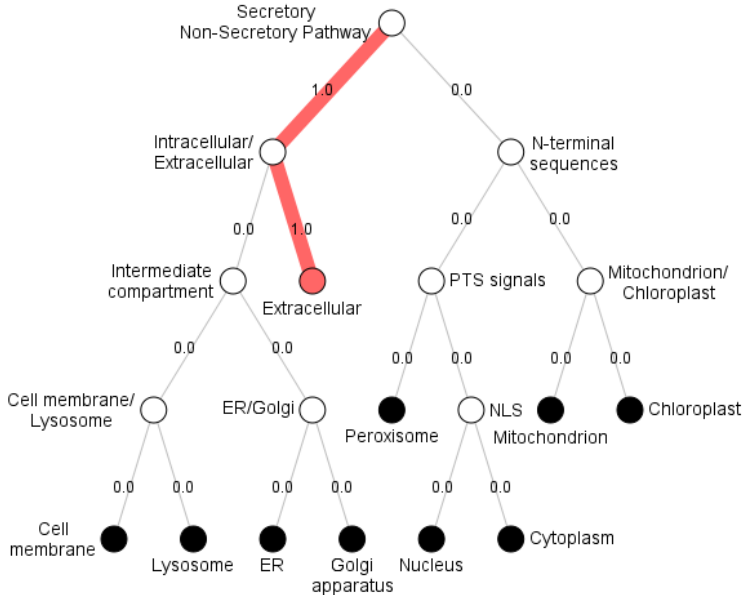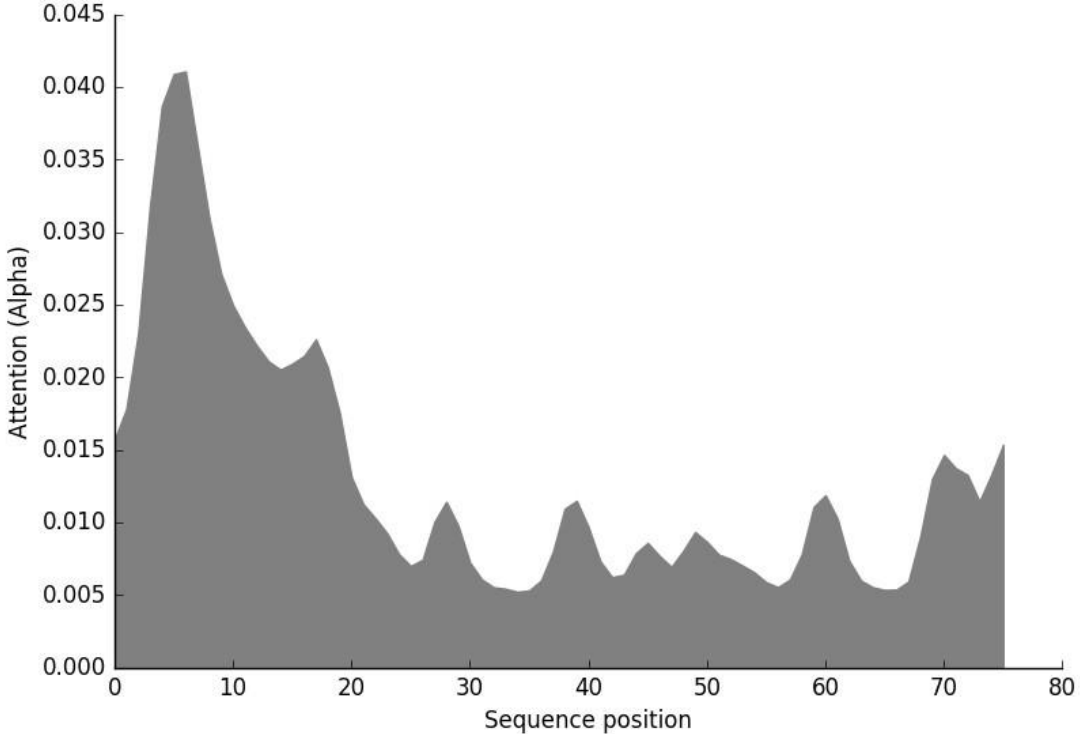

XP\_010319372.1

Prediction: Extracellular, Soluble

| Localization | Extracellular | Lysosome/Vacuole | Endoplasmic reticulum | Cell membrane | Golgi apparatus | Mitochondrion | Cytoplasm | Plastid | Nucleus | Peroxisome |
|--------------|---------------|------------------|-----------------------|---------------|-----------------|---------------|-----------|---------|---------|------------|
| Likelihood   | 1             | 0                | 0                     | 0             | 0               | 0             | 0         | 0       | 0       | 0          |

| Type       | Soluble | Membrane |
|------------|---------|----------|
| Likelihood | 1       | 0        |

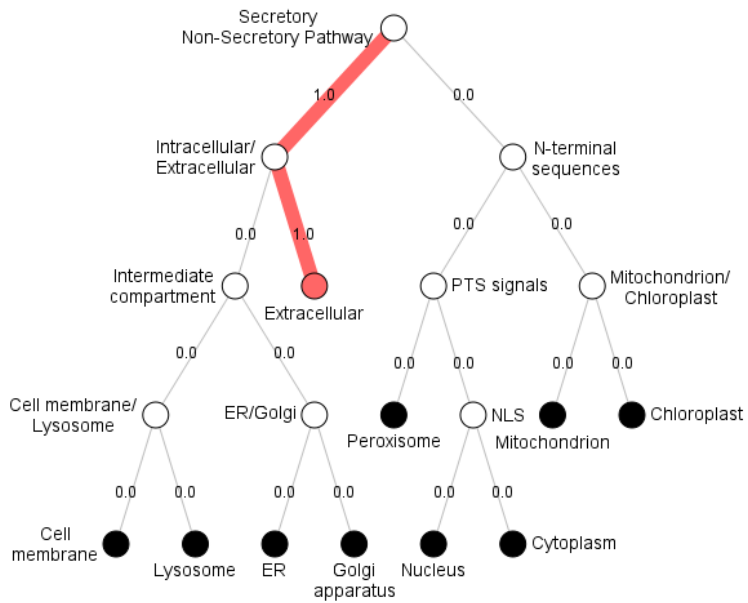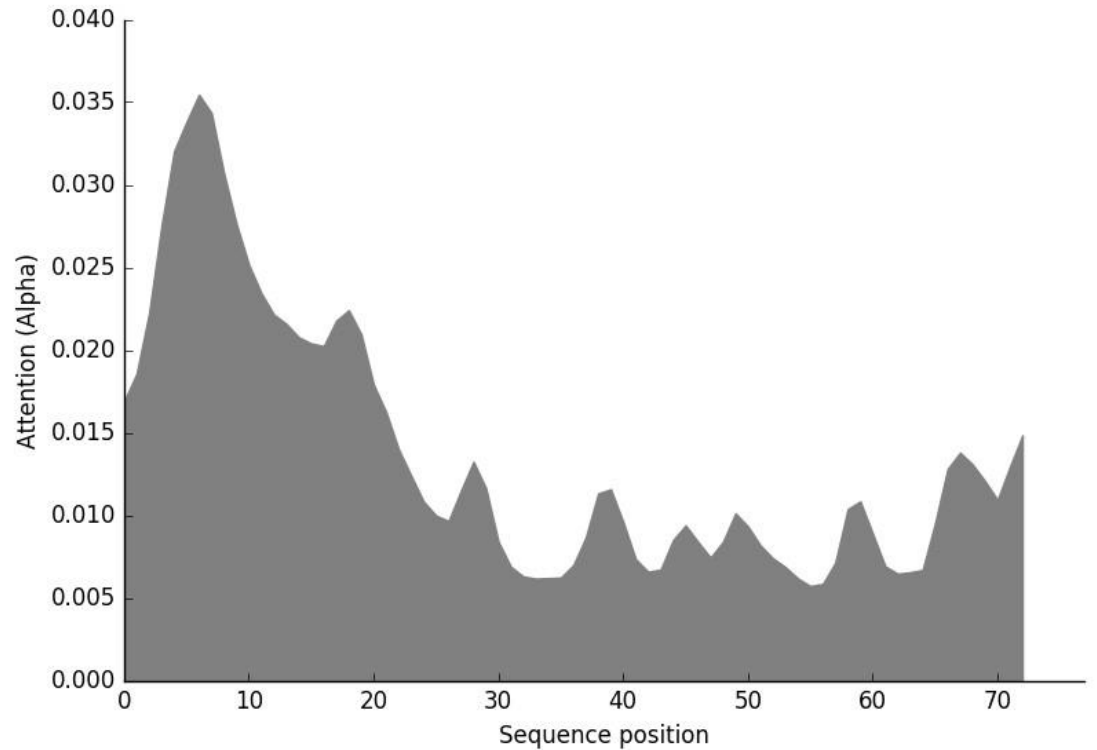

XP\_025886757.1

Prediction: Extracellular, Soluble

| Localization | Extracellular | Cell membrane | Lysosome/Vacuole | Endoplasmic reticulum | Golgi apparatus | Cytoplasm | Mitochondrion | Nucleus | Plastid | Peroxisome |
|--------------|---------------|---------------|------------------|-----------------------|-----------------|-----------|---------------|---------|---------|------------|
| Likelihood   | 0.9996        | 0.0003        | 0.0001           | 0                     | 0               | 0         | 0             | 0       | 0       | 0          |

| Type       | Soluble | Membrane |
|------------|---------|----------|
| Likelihood | 0.9982  | 0.0018   |

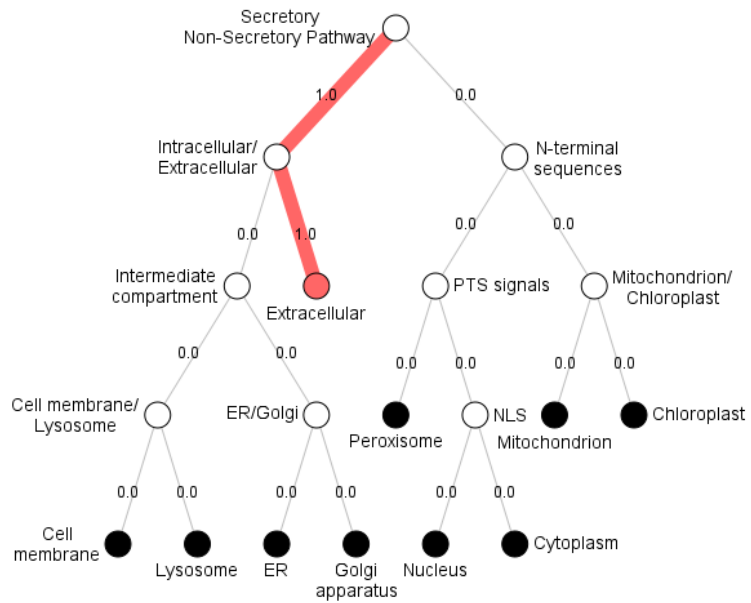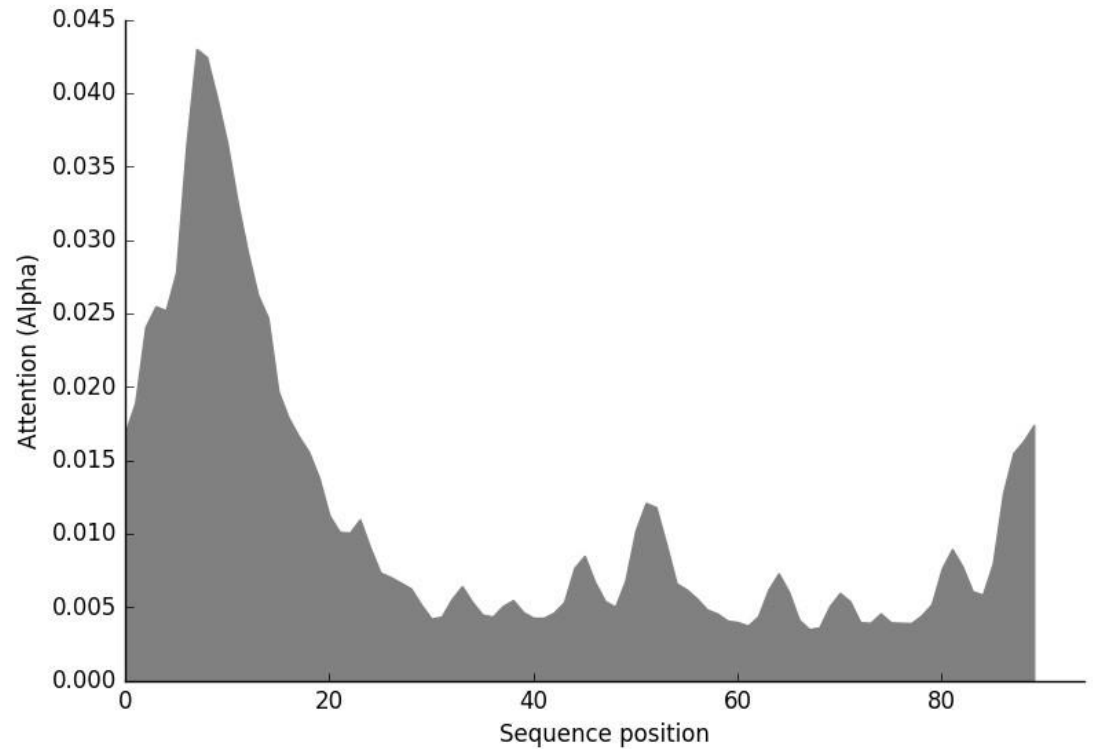

NP\_001333453.1

Prediction: Extracellular, Soluble

| Localization | Extracellular | Lysosome/Vacuole | Endoplasmic reticulum | Cell membrane | Cytoplasm | Golgi apparatus | Mitochondrion | Plastid | Nucleus | Peroxisome |
|--------------|---------------|------------------|-----------------------|---------------|-----------|-----------------|---------------|---------|---------|------------|
| Likelihood   | 0.9999        | 0                | 0                     | 0             | 0         | 0               | 0             | 0       | 0       | 0          |

| Type       | Soluble | Membrane |
|------------|---------|----------|
| Likelihood | 1       | 0        |

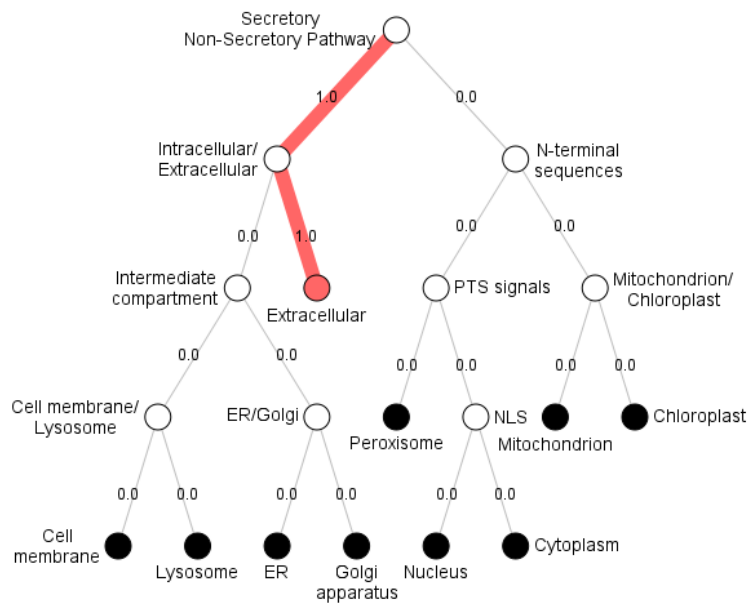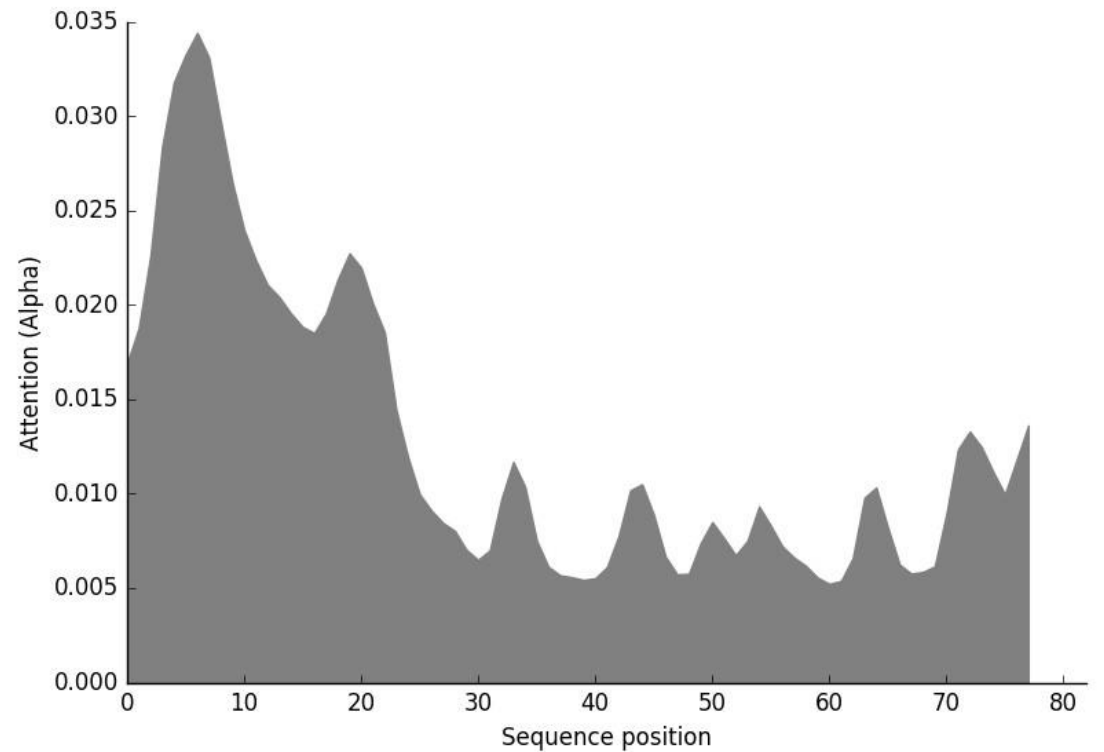

XP\_004242838.1

Prediction: Extracellular, Soluble

| Localization | Extracellular | Lysosome/Vacuole | Endoplasmic reticulum | Cytoplasm | Cell membrane | Golgi apparatus | Mitochondrion | Plastid | Nucleus | Peroxisome |
|--------------|---------------|------------------|-----------------------|-----------|---------------|-----------------|---------------|---------|---------|------------|
| Likelihood   | 1             | 0                | 0                     | 0         | 0             | 0               | 0             | 0       | 0       | 0          |

| Type       | Soluble | Membrane |
|------------|---------|----------|
| Likelihood | 1       | 0        |

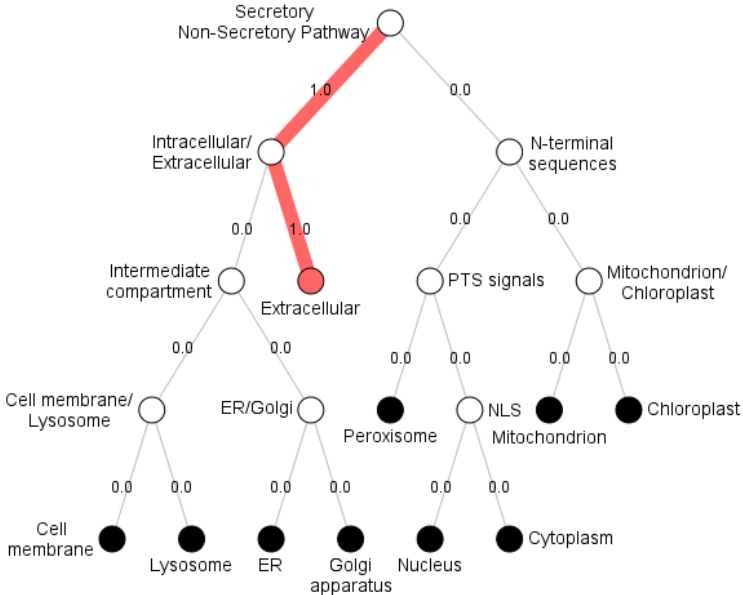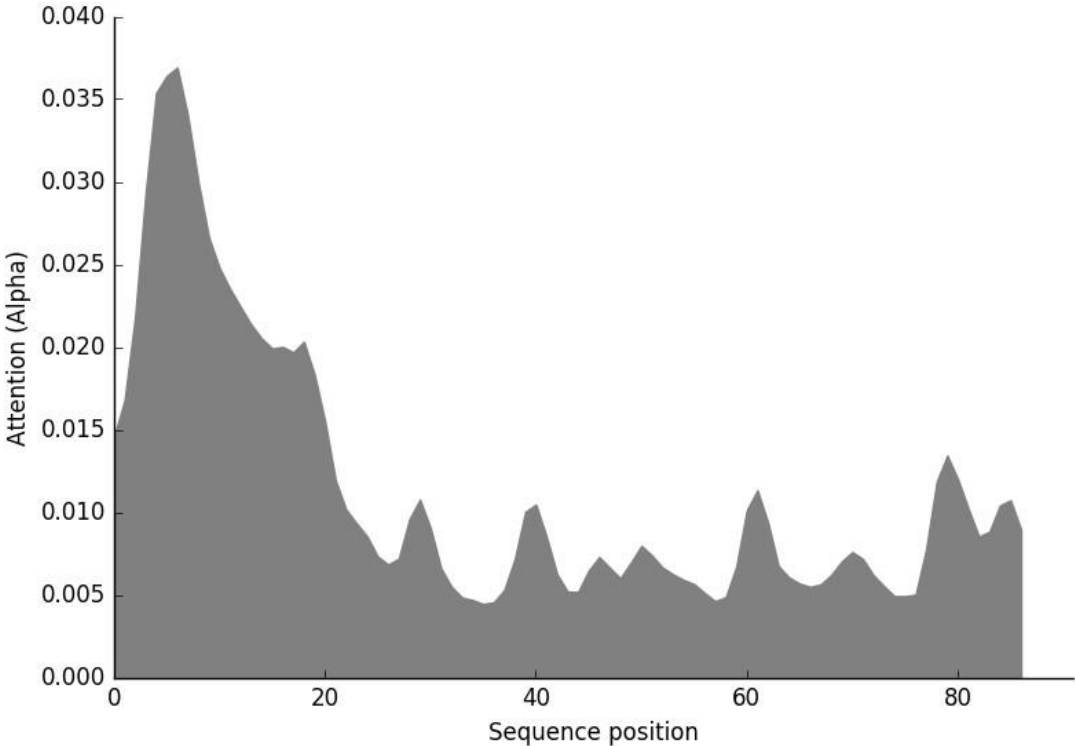

NP\_001297246.1

Prediction: Extracellular, Soluble

| Localization | Extracellular | Lysosome/Vacuole | Endoplasmic reticulum | Cell membrane | Mitochondrion | Cytoplasm | Golgi apparatus | Plastid | Nucleus | Peroxisome |
|--------------|---------------|------------------|-----------------------|---------------|---------------|-----------|-----------------|---------|---------|------------|
| Likelihood   | 1             | 0                | 0                     | 0             | 0             | 0         | 0               | 0       | 0       | 0          |

| Type       | Soluble | Membrane |
|------------|---------|----------|
| Likelihood | 1       | 0        |

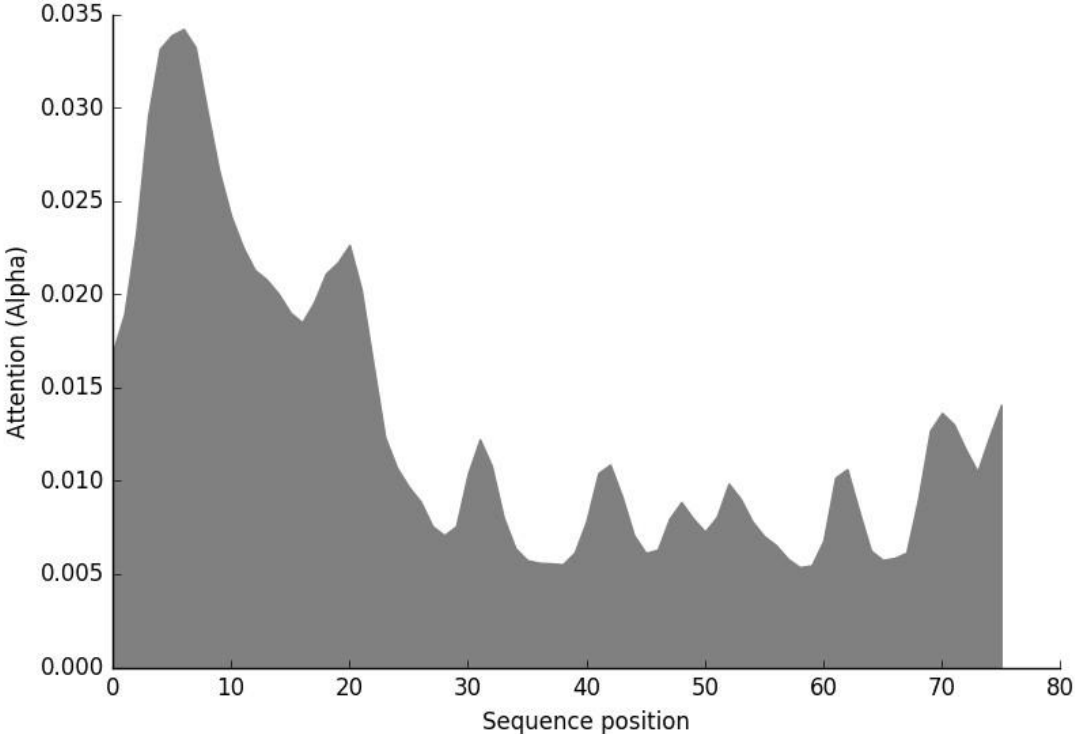

NP\_001234872.2

Prediction: Extracellular, Soluble

| Localization | Extracellular | Lysosome/Vacuole | Endoplasmic reticulum | Cell membrane | Mitochondrion | Golgi apparatus | Cytoplasm | Plastid | Nucleus | Peroxisome |
|--------------|---------------|------------------|-----------------------|---------------|---------------|-----------------|-----------|---------|---------|------------|
| Likelihood   | 1             | 0                | 0                     | 0             | 0             | 0               | 0         | 0       | 0       | 0          |

| Type       | Soluble | Membrane |
|------------|---------|----------|
| Likelihood | 1       | 0        |

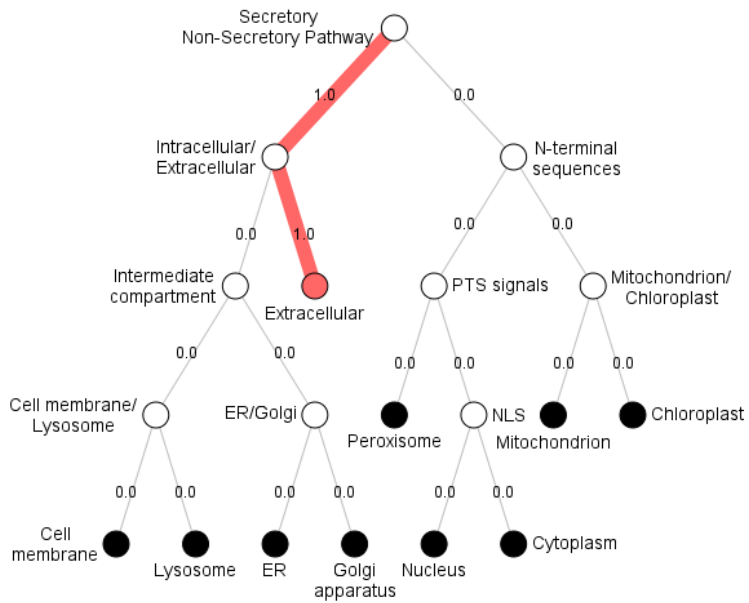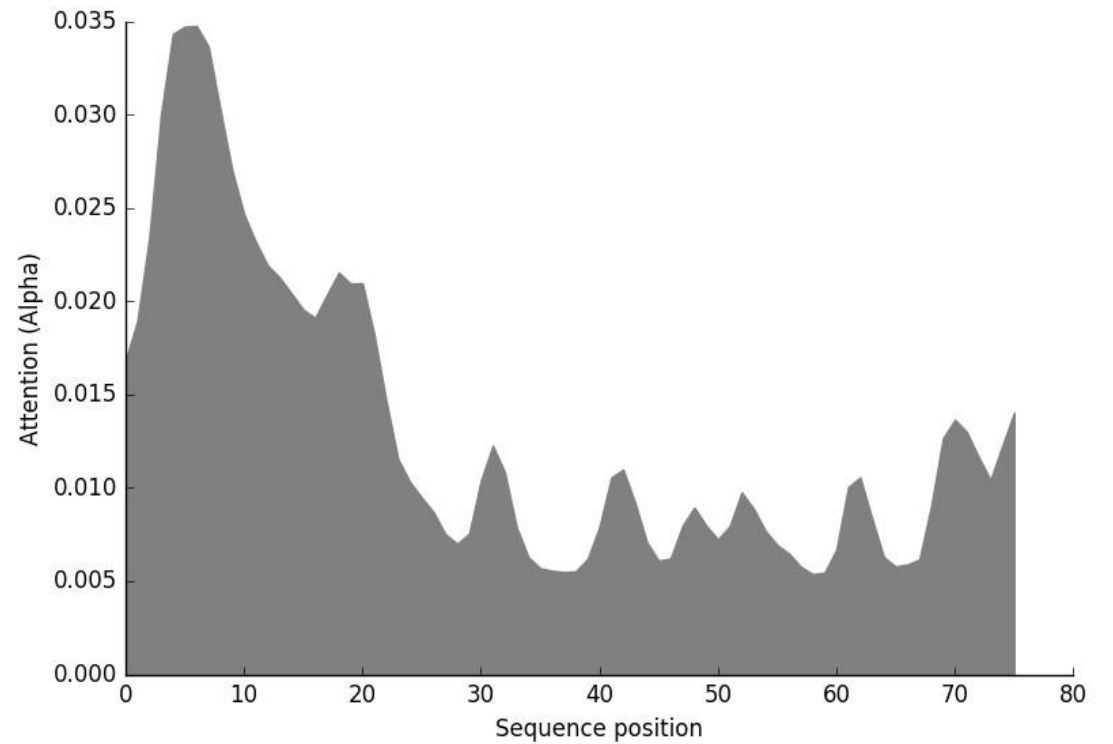



NP\_001297247.1

Prediction: Extracellular, Soluble

| Localization | Extracellular | Lysosome/Vacuole | Endoplasmic reticulum | Cell membrane | Cytoplasm | Golgi apparatus | Mitochondrion | Plastid | Nucleus | Peroxisome |
|--------------|---------------|------------------|-----------------------|---------------|-----------|-----------------|---------------|---------|---------|------------|
| Likelihood   | 0.9998        | 0.0001           | 0                     | 0             | 0         | 0               | 0             | 0       | 0       | 0          |

| Type       | Soluble | Membrane |
|------------|---------|----------|
| Likelihood | 1       | 0        |

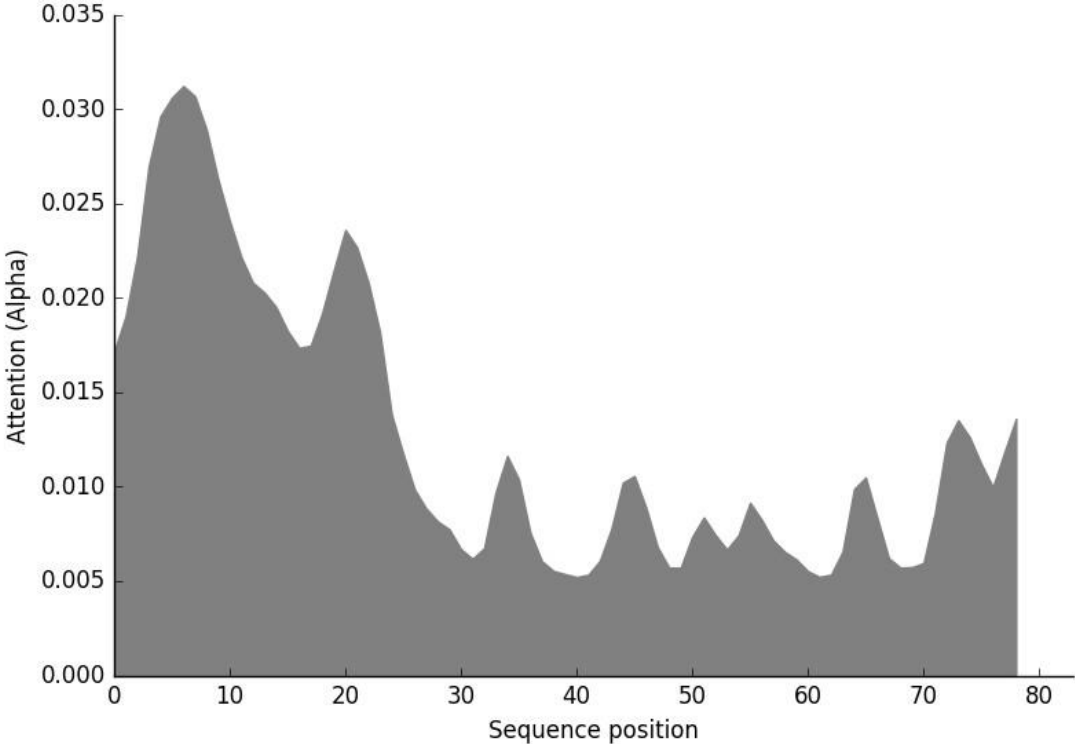

XP\_019069532.1

Prediction: Extracellular, Soluble

| Localization | Extracellular | Cell membrane | Lysosome/Vacuole | Cytoplasm | Endoplasmic reticulum | Golgi apparatus | Mitochondrion | Plastid | Nucleus | Peroxisome |
|--------------|---------------|---------------|------------------|-----------|-----------------------|-----------------|---------------|---------|---------|------------|
| Likelihood   | 0.9977        | 0.0012        | 0.0011           | 0         | 0                     | 0               | 0             | 0       | 0       | 0          |

| Type       | Soluble | Membrane |
|------------|---------|----------|
| Likelihood | 0.9986  | 0.0014   |

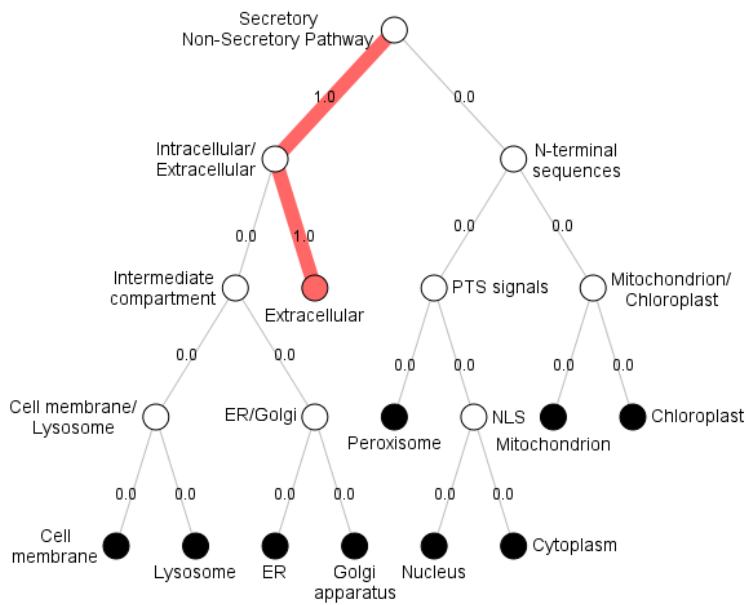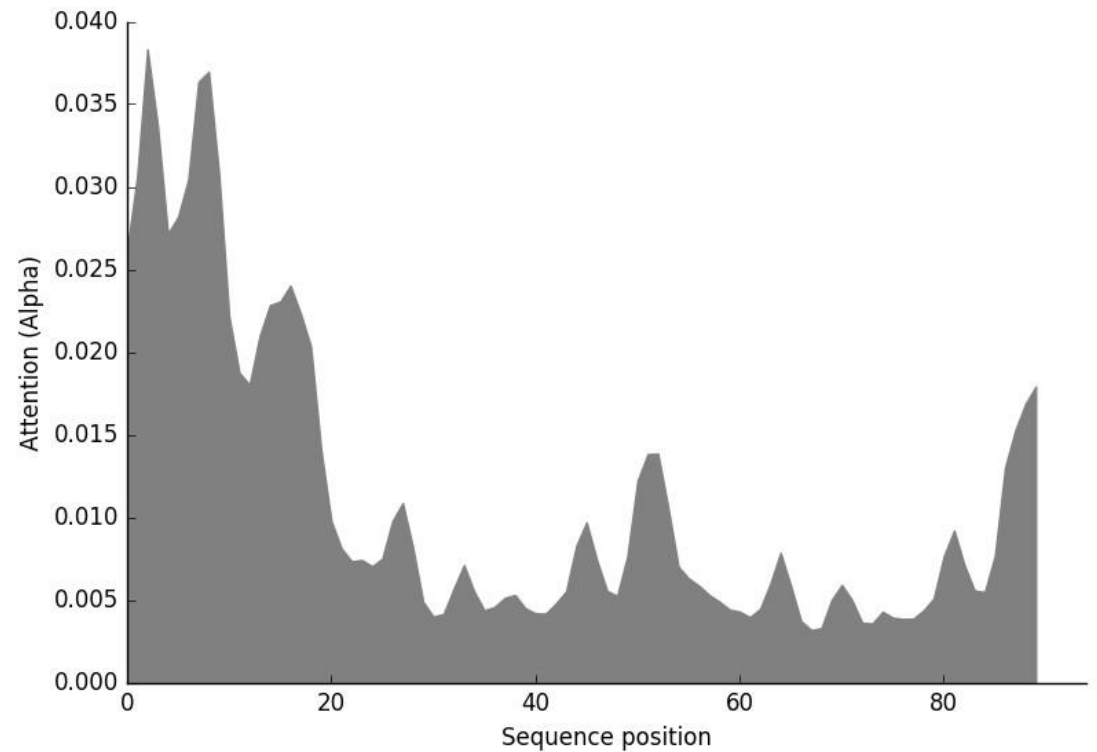

Supplement: s1 [file s1]
