# Supplementary material for: Structural Diversity and Highly Specific Host-Pathogen Transcriptional Regulation of Defensin Genes Is Revealed in Tomato
Source: MDPI journal article supplement (doi:10.3390/ijms21249380), 2020-12-09

**Supporting information 2: Signal peptide prediction for *Solanum lycopersicum* defensin genes**

```
# NP_001234872.2 Length: 76
# NP_001234872.2 Number of predicted TMHs: 1
# NP_001234872.2 Exp number of AAs in TMHs: 20.08864
# NP_001234872.2 Exp number, first 60 AAs: 20.08864
# NP_001234872.2 Total prob of N-in: 0.65780
# NP_001234872.2 POSSIBLE N-term signal sequence
NP_001234872.2 TMHMM2.0 inside 1 6
NP_001234872.2 TMHMM2.0 TMhelix 7 29
NP_001234872.2 TMHMM2.0 outside 30 76
```

TMHMM posterior probabilities for NP\_001234872.2

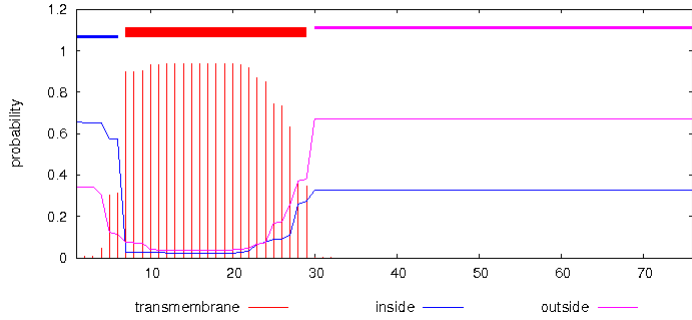

```
# XP_025886757.1 Length: 90
# XP_025886757.1 Number of predicted TMHs: 1
# XP_025886757.1 Exp number of AAs in TMHs: 19.3174
# XP_025886757.1 Exp number, first 60 AAs: 19.31738
# XP_025886757.1 Total prob of N-in: 0.64399
# XP_025886757.1 POSSIBLE N-term signal sequence
XP_025886757.1 TMHMM2.0 inside 1 6
XP_025886757.1 TMHMM2.0 TMhelix 7 25
XP_025886757.1 TMHMM2.0 outside 26 90
```

TMHMM posterior probabilities for XP\_025886757.1

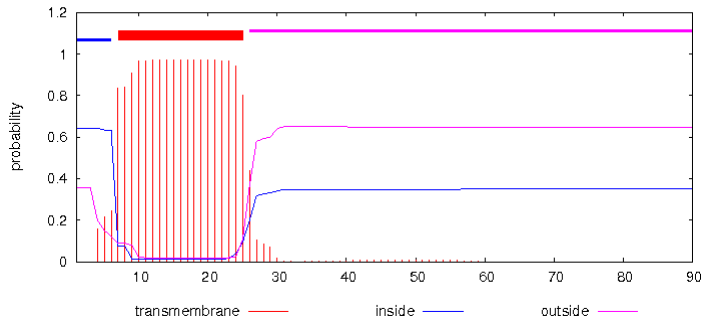

```
# XP_019069532.1 Length: 90
# XP_019069532.1 Number of predicted TMHs: 1
# XP_019069532.1 Exp number of AAs in TMHs: 18.37668
# XP_019069532.1 Exp number, first 60 AAs: 18.37666
# XP_019069532.1 Total prob of N-in: 0.65422
# XP_019069532.1 POSSIBLE N-term signal sequence
XP_019069532.1 TMHMM2.0 inside 1 6
XP_019069532.1 TMHMM2.0 TMhelix 7 25
XP_019069532.1 TMHMM2.0 outside 26 90
```

TMHMM posterior probabilities for XP\_019069532.1

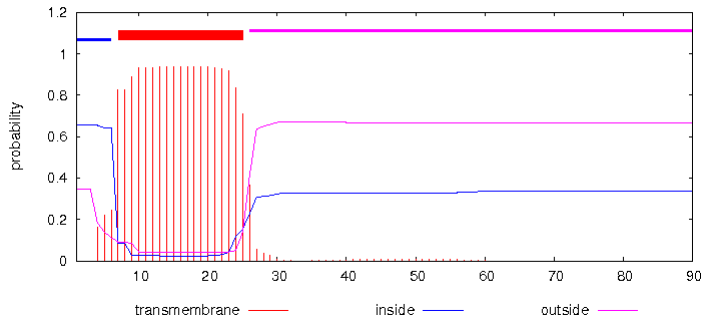

```
# NP_001333453.1 Length: 78
# NP_001333453.1 Number of predicted TMHs: 1
# NP_001333453.1 Exp number of AAs in TMHs: 18.18155
# NP_001333453.1 Exp number, first 60 AAs: 18.18155
# NP_001333453.1 Total prob of N-in: 0.81765
# NP_001333453.1 POSSIBLE N-term signal sequence
NP_001333453.1 TMHMM2.0 inside 1 6
NP_001333453.1 TMHMM2.0 TMhelix 7 29
NP_001333453.1 TMHMM2.0 outside 30 78
```

TMHMM posterior probabilities for NP\_001333453.1

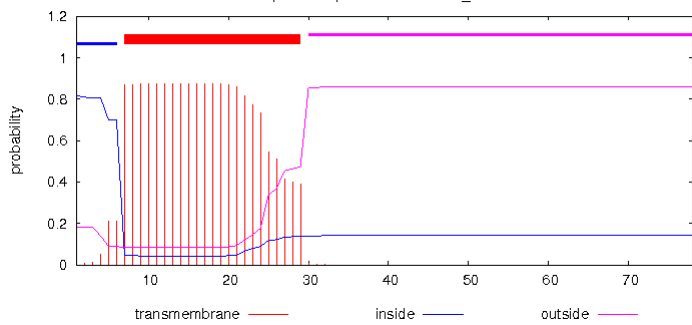

# XP\_004242851.1 Length: 76  
 # XP\_004242851.1 Number of predicted TMHs: 0  
 # XP\_004242851.1 Exp number of AAs in TMHs: 9.71154  
 # XP\_004242851.1 Exp number, first 60 AAs: 9.70658  
 # XP\_004242851.1 Total prob of N-in: 0.35171  
 XP\_004242851.1 TMHMM2.0 outside 1 76

TMHMM posterior probabilities for XP\_004242851.1

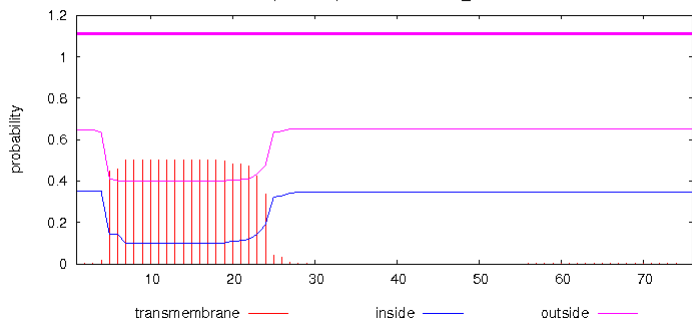

# NP\_001297246.1 Length: 76  
 # NP\_001297246.1 Number of predicted TMHs: 1  
 # NP\_001297246.1 Exp number of AAs in TMHs: 19.65751  
 # NP\_001297246.1 Exp number, first 60 AAs: 19.65657  
 # NP\_001297246.1 Total prob of N-in: 0.60035  
 # NP\_001297246.1 POSSIBLE N-term signal sequence  
 NP\_001297246.1 TMHMM2.0 outside 1 4  
 NP\_001297246.1 TMHMM2.0 TMhelix 5 27  
 NP\_001297246.1 TMHMM2.0 inside 28 76

TMHMM posterior probabilities for NP\_001297246.1

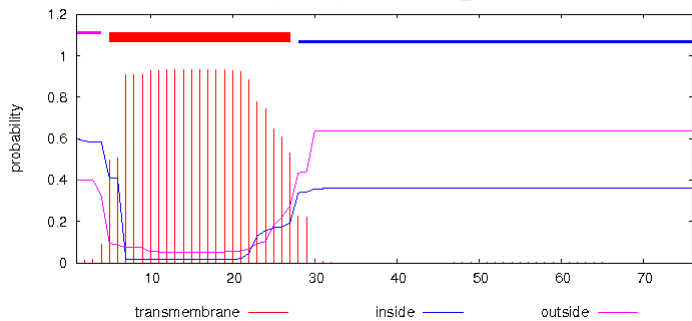

# NP\_001297247.1 Length: 79  
 # NP\_001297247.1 Number of predicted TMHs: 1  
 # NP\_001297247.1 Exp number of AAs in TMHs: 18.87905  
 # NP\_001297247.1 Exp number, first 60 AAs: 18.87123  
 # NP\_001297247.1 Total prob of N-in: 0.68908  
 # NP\_001297247.1 POSSIBLE N-term signal sequence  
 NP\_001297247.1 TMHMM2.0 outside 1 4  
 NP\_001297247.1 TMHMM2.0 TMhelix 5 27  
 NP\_001297247.1 TMHMM2.0 inside 28 79

TMHMM posterior probabilities for NP\_001297247.1

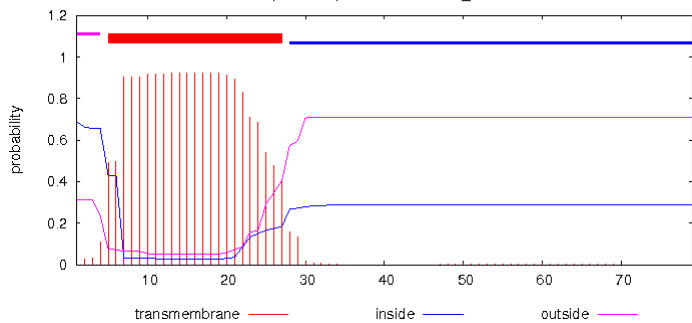

# XP\_010319372.1 Length: 73  
 # XP\_010319372.1 Number of predicted TMHs: 1  
 # XP\_010319372.1 Exp number of AAs in TMHs: 15.75835  
 # XP\_010319372.1 Exp number, first 60 AAs: 15.75832  
 # XP\_010319372.1 Total prob of N-in: 0.80968  
 # XP\_010319372.1 POSSIBLE N-term signal sequence

```

XP_010319372.1 TMHMM2.0    inside    1    6
XP_010319372.1 TMHMM2.0    TMhelix   7   24
XP_010319372.1 TMHMM2.0    outside   25   73

```

TMHMM posterior probabilities for XP\_010319372.1

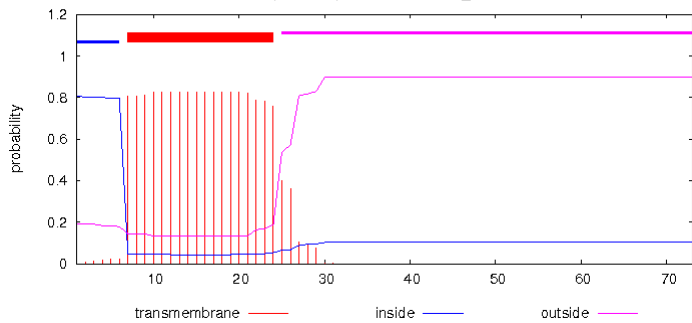

```

# XP_004242838.1 Length: 87
# XP_004242838.1 Number of predicted TMHs: 1
# XP_004242838.1 Exp number of AAs in TMHs: 18.9957
# XP_004242838.1 Exp number, first 60 AAs: 18.99367
# XP_004242838.1 Total prob of N-in: 0.69912
# XP_004242838.1 POSSIBLE N-term signal sequence
XP_004242838.1 TMHMM2.0    inside    1    6
XP_004242838.1 TMHMM2.0    TMhelix   7   25
XP_004242838.1 TMHMM2.0    outside   26   87

```

TMHMM posterior probabilities for XP\_004242838.1

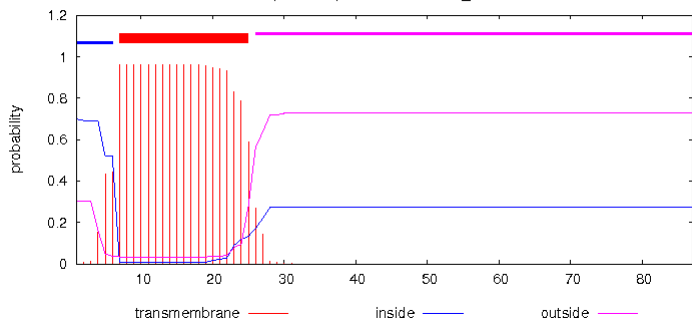

```

# NP_001315592.1 Length: 105
# NP_001315592.1 Number of predicted TMHs: 1
# NP_001315592.1 Exp number of AAs in TMHs: 17.26303
# NP_001315592.1 Exp number, first 60 AAs: 17.26303
# NP_001315592.1 Total prob of N-in: 0.19849
# NP_001315592.1 POSSIBLE N-term signal sequence
NP_001315592.1 TMHMM2.0    outside    1    3
NP_001315592.1 TMHMM2.0    TMhelix   4   21
NP_001315592.1 TMHMM2.0    inside   22   105

```

TMHMM posterior probabilities for NP\_001315592.1

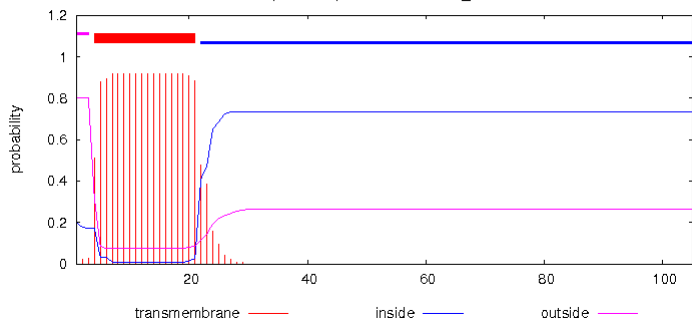

Supplement: s1 [file s1]
