# Supplementary material for: Structural Diversity and Highly Specific Host-Pathogen Transcriptional Regulation of Defensin Genes Is Revealed in Tomato
Source: MDPI journal article supplement (doi:10.3390/ijms21249380), 2020-12-09

Structural diversity and highly specific host-pathogen transcriptional regulation of defensin genes is revealed in tomato seedlings

**Supporting information 5: Stacked sequence profiles of tomato defensin accessions.**

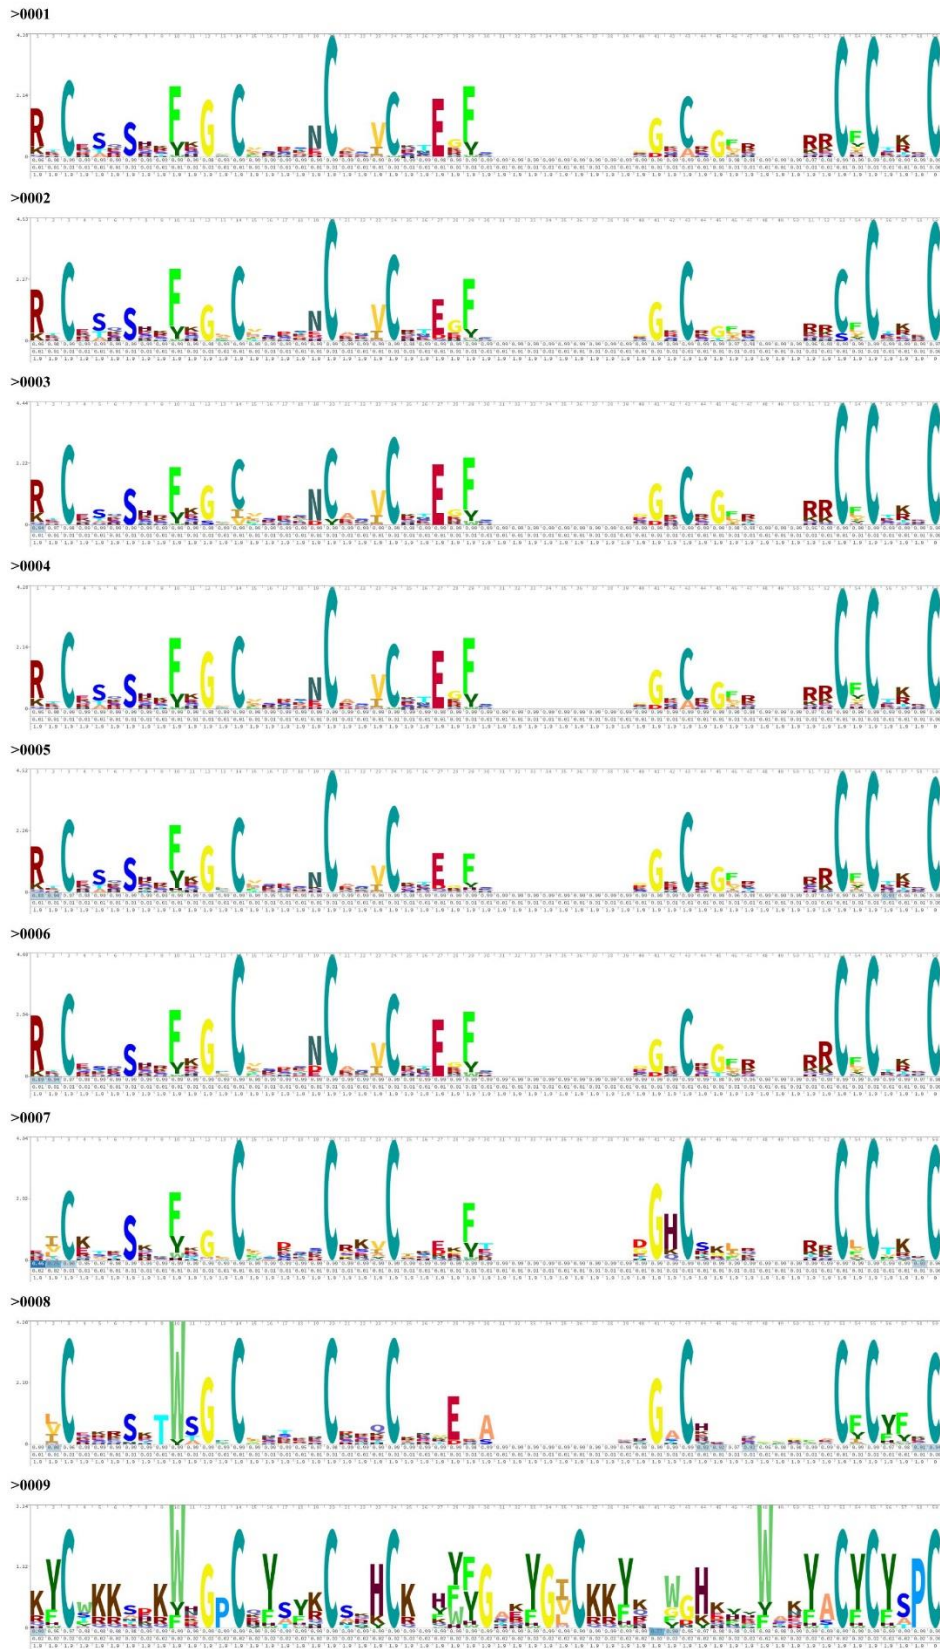

Supplement: s1 [file s1]
