# Supplementary material for: Structural Diversity and Highly Specific Host-Pathogen Transcriptional Regulation of Defensin Genes Is Revealed in Tomato
Source: MDPI journal article supplement (doi:10.3390/ijms21249380), 2020-12-09

**Supporting information 6: Relative transcription for tomato defensin genes exposed to discrete biotic/abiotic stresses. Relative mRNA abundance was assessed by real-time RT-qPCR. Data were standardized as reported in the Material and Methods segment. Significant differences between treatments were determined by ANOVA and post-hoc comparisons by least significant difference ( $P < 0.05$ ). Bars represent means ( $\pm$  SE) of three biological replications. Vertical axis shows the relative expression to the control gene Ubiquitin.**

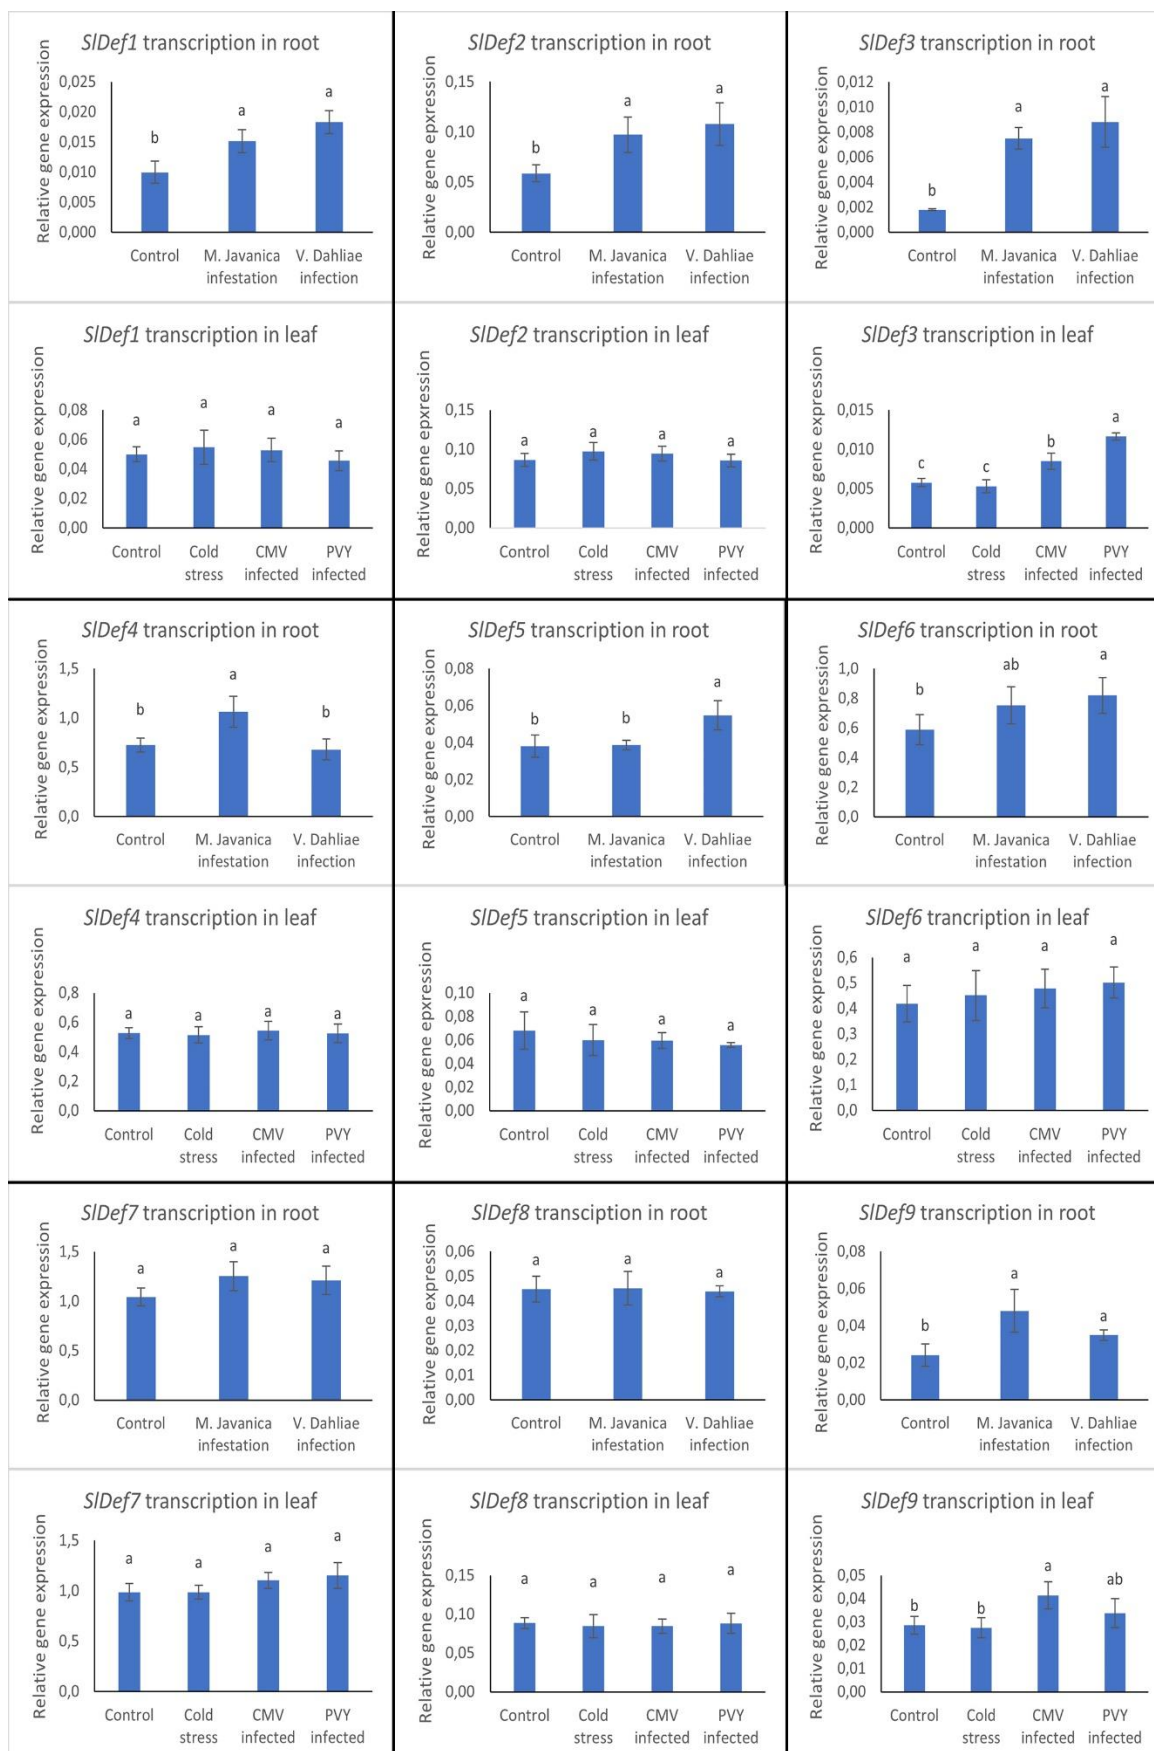

Supplement: s1 [file s1]
