# Supplementary material for: Structural Diversity and Highly Specific Host-Pathogen Transcriptional Regulation of Defensin Genes Is Revealed in Tomato
Source: MDPI journal article supplement (doi:10.3390/ijms21249380), 2020-12-09
Supplement: s1 [file s1]

Nikoloudakis et al.

Structural diversity and highly specific host-pathogen transcriptional regulation of defensin genes is revealed in tomato seedlings

**Supporting information 7: Primers used for the amplification of *Solanum lycopersicum* defensin genes (S1Def1 - S1Def9) across treatments, and Ubiquitin (UBQ) control**

|    | <b>Gene code</b> | <b>Forward primer (5'-3')</b> | <b>Reverse primer (5'-3')</b> |
|----|------------------|-------------------------------|-------------------------------|
| 1  | S1Def1           | AGGACCATGTGTGAGTGAGA          | CGACAATCACCACCGAAAA           |
| 2  | S1Def2           | TTTCATGTGTGATAGGGCGTGA        | GGCAACCCTTGATCGCATGT          |
| 3  | S1Def3           | AGCACCAAGCCAAACTTTCC          | TTTGCTTCCTCACCCAAAGT          |
| 4  | S1Def4           | TGGTTTTCTTGCCCTCCTCA          | GTGGCAAGGTGAGTAGCAGT          |
| 5  | S1Def5           | CCGTGCGTGAGGAAGAACAA          | GTTTAGCGCAGAAGCAACGG          |
| 6  | S1Def6           | TTTTGCTTCCTCCTCGTTGC          | ATGTCTTGCTCCGCCTTTGA          |
| 7  | S1Def7           | AATTGTGGTTCGGTTTGCCG          | CAATTCGGGTGCAAAGCA            |
| 8  | S1Def8           | TTAGCAGTGACAGAGCAAGA          | CTTCAGTCTGGCAAACGGTG          |
| 9  | S1Def9           | ACTGAAATGGGACCAACGAGAA        | TGGTCCCTTGAAACGATGGC          |
| 10 | UBQ              | GCAGACTATAACATCCAGAAAGAG      | AACAACAAGCACACAGCCATC         |
