# Supplementary material for: Structural Diversity and Highly Specific Host-Pathogen Transcriptional Regulation of Defensin Genes Is Revealed in Tomato
Source: MDPI journal article supplement (doi:10.3390/ijms21249380), 2020-12-09

**Supporting information 3: Proportion of Amino acids across *Solanum lycopersicum* defensin genes**

| Amino acids | One letter code | Percentage |
|-------------|-----------------|------------|
| Tyr         | (Y)             | 2.50%      |
| Trp         | (W)             | 0.80%      |
| Val         | (V)             | 4.90%      |
| Thr         | (T)             | 6.00%      |
| Ser         | (S)             | 7.20%      |
| Arg         | (R)             | 6.60%      |
| Gln         | (Q)             | 2.80%      |
| Pro         | (P)             | 2.70%      |
| Asn         | (N)             | 3.40%      |
| Met         | (M)             | 3.70%      |
| Leu         | (L)             | 7.20%      |
| Lys         | (K)             | 6.10%      |
| Ile         | (I)             | 4.20%      |
| His         | (H)             | 2.50%      |
| Gly         | (G)             | 7.80%      |
| Phe         | (F)             | 6.50%      |
| Glu         | (E)             | 4.70%      |
| Asp         | (D)             | 2.50%      |
| Cys         | (C)             | 11.10%     |
| Ala         | (A)             | 6.50%      |

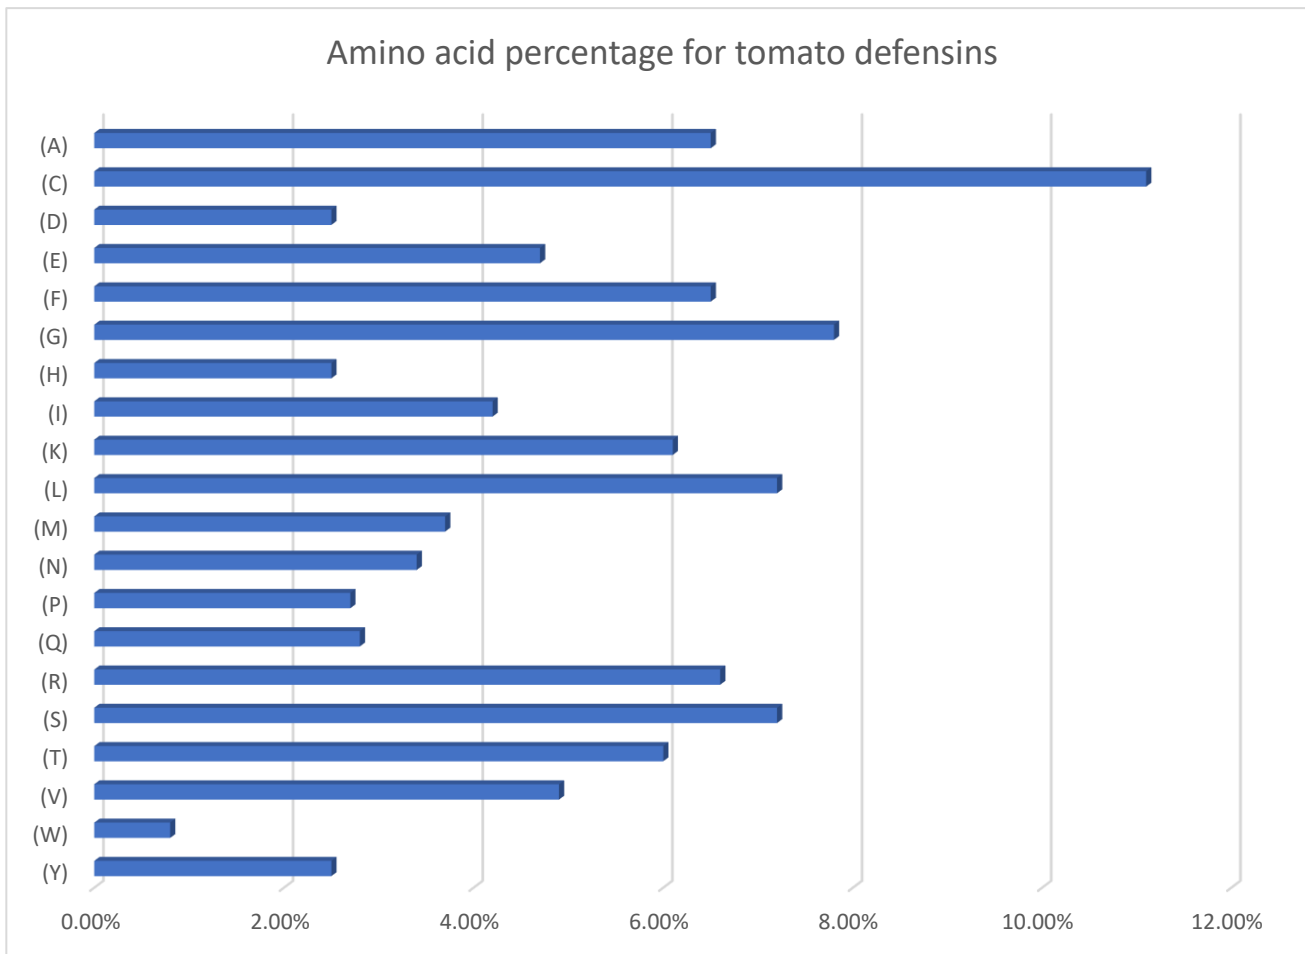

Supplement: s1 [file s1]
